# Supplementary material for: A series of silver(i) pyridone-sulfonates with 1-D “butterfly” chain, 2-D lamellar network and 3-D pillared layered frameworks: syntheses, structures and characterizations
Source: Royal Society of Chemistry journal article supplement (doi:10.1039/b907389b), 2009-01-01
Supplement: b907389b.pdf [file b907389b.pdf]

Electronic Supplementary Information (ESI)

**A Series of New Silver (I) Pyridone-sulfonates with 1-D “Butterfly”  
Chain, 2-D Lamellar Network versus 3-D Pillared Layered Framework:  
Syntheses, Structures and Characterizations**

Zhao-Peng Deng,<sup>a</sup> Zhi-Biao Zhu,<sup>a</sup> Shan Gao<sup>\*a</sup>, Li-Hua Huo<sup>a</sup>, Hui Zhao<sup>a</sup> and Seik Weng Ng<sup>b</sup>

**Figure S1.** Solid-state photoluminescent spectra of free ligands **H<sub>2</sub>L1** and **H<sub>2</sub>L2** at room temperature.

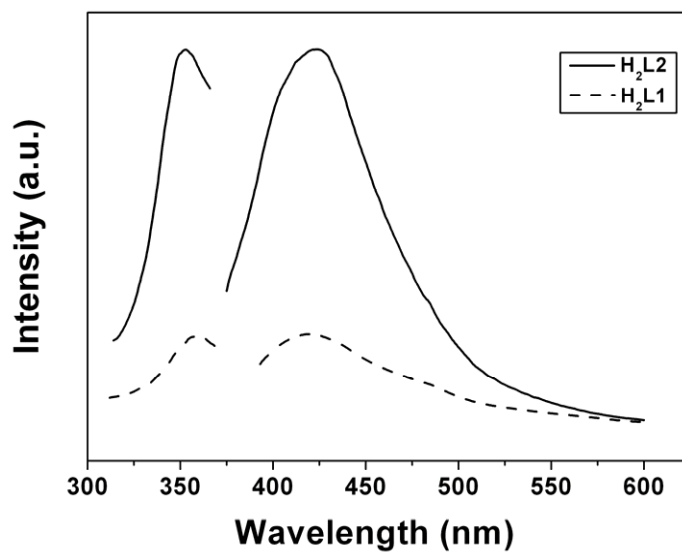

**Figure S1.** Solid-state photoluminescent spectra of free ligands **H<sub>2</sub>L1** and **H<sub>2</sub>L2** at room temperature.

**Luminescent Property.** Luminescent properties concerning silver(I) sulfonates are rarely explored, despite the fact that many silver(I)-sulfonate compounds have been reported.<sup>1</sup> In this paper, the luminescent behaviors of complexes **2-4**, together with the free ligands **H<sub>2</sub>L1** and **H<sub>2</sub>L2**, were investigated at room temperature in the solid state. As depicted in Figure S1, excitation at 353 nm leads to strong blue-fluorescent emission band at 423 nm for free **H<sub>2</sub>L2**, while **H<sub>2</sub>L1** exhibits weaker emission bands at 420 nm upon excitation at 360 nm, which has been reported in a recent *communication*.<sup>2</sup> Unfortunately, no clear luminescence was detected for complexes **2-4**, which can be attributed to the heavy atom effect<sup>3</sup> due to the coordination of the ligand to a heavy Ag(I) center. Simultaneously, it has been reported that metal ions such as Ag(I) can quench the luminescence.<sup>4</sup>

## References

- 1 (a) Y. B. Dong, G. X. Jin, M. D. Smith, R. Q. Huang, B. Tang and H. C. zur Loye, *Inorg. Chem.* 2002, **41**, 4909; (b) S. Q. Liu, T. Kuroda-Sowa, H. Konaka, Y. Suenaga, M. Maekawa, T. Mizutani, G. L. Ning and M. Munakata, *Inorg. Chem.* 2005, **44**, 1031.
- 2 Z. P. Deng, Z. B. Zhu, S. Gao, L. H. Huo and H. Zhao, *Dalton Trans.* 2009, 1290.
- 3 (a) T. C. Warner, W. Hawkins, J. Facci, R. Torrisi and T. Trembath, *J. Phys. Chem.* 1978, **82**, 298; (b) M. C. Aragoni, M. Arca, F. Demartin, F. A. Devillanova, F. Isaia, A. Garau, V. Lippolis, F. Jalali, U. Papke, M. Shamsipur, L. Tei, A. Yari and G. Verani, *Inorg. Chem.* 2002, **41**, 6623; (c) C. Seward, J. Chan, D. Song and S. N. Wang, *Inorg. Chem.* 2003, **42**, 1112.
- 4 (a) P. D. Harvey and D. Fortin, *Coord. Chem. Rev.* 1998, **171**, 351; (b) H. F. Zhu, L. Li, T. A. Okamura, W. Zhao, W. Y. Sun and N. Ueyama, *Bull. Chem. Soc. Jpn.* 2003, **76**, 761.
